# Supplementary material
Source: publisher site journal article supplement (https://www.dovepress.com/article/441196)
Supplement: Supplementary file 1 [file get_supplementary_file.php]

Supplement 1: Plan, do, study, and act cycle for the intervention period

Plan

Improve the medical documentation


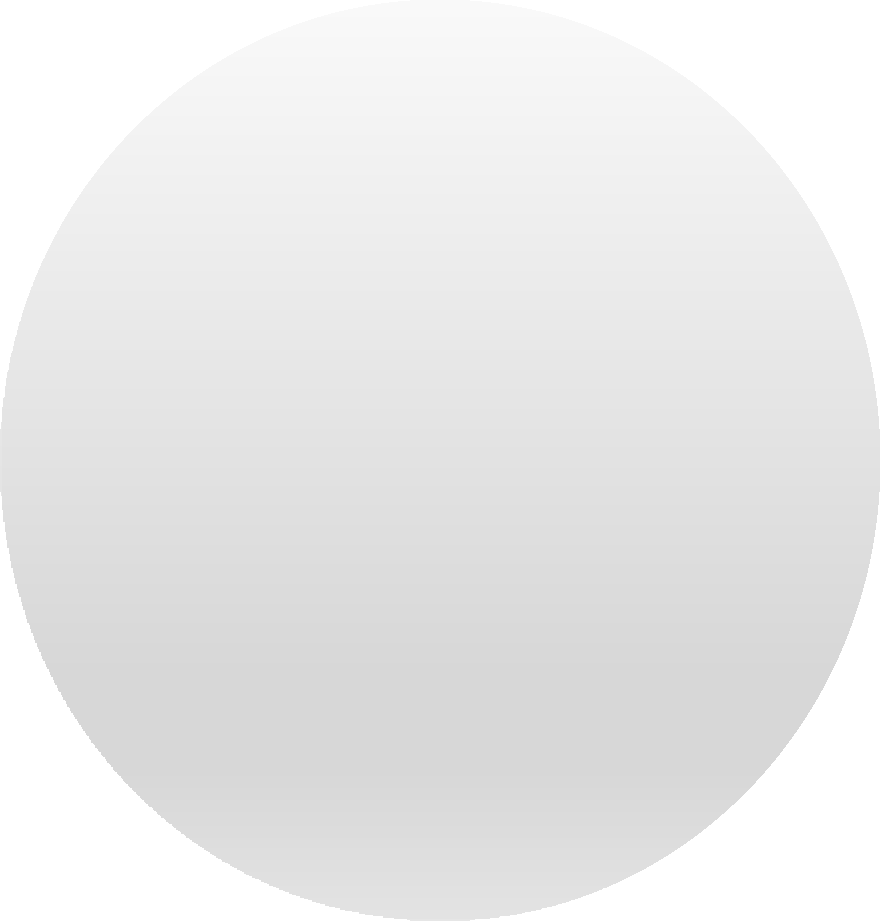

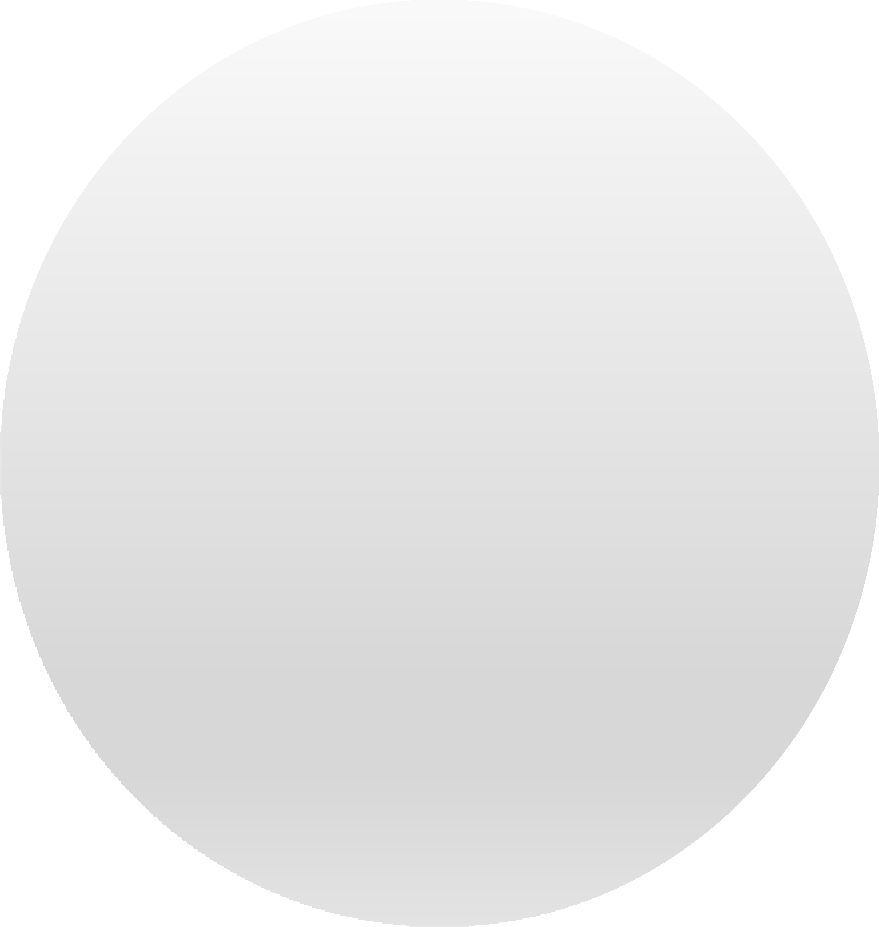


- Maintaining improvement for six months
- Analysis using the control chart

Act

Improvement in medical documentation

DO

Senior physician audit feedback of medical documentation

Study

Collect data on the medical documentation

Plan

Improve the medical documentation

Act

Better improvement than PDSA1 seen

DO

Add the telegram page and weekly meeting

Study

- Collect data on the medical documentation

**Supplement 2:** Audit tool used by the senior physician to evaluate the junior physician's clinical documentation

|  | **Variables** | **Response** | **Comment** |
| --- | --- | --- | --- |
| Q1 | Is the patient  evaluated timely? | - 1. 1. Yes, done within 30 minutes of admission for critical patients:   2. 2. No, done within 30 minutes of admission for critical patients: | - - *This is the maximum time limit when the ward is busy*   - *The nurse takes the vital signs immediately when patients are admitted and reports to the physician* |
|  |  | 1. Yes, done within the 2 hours of admission for stable patients: 2. No, done within the 2 hours of admission for stable patients: |
| Q2 | Is the history appropriate? | 1. Yes, appropriate history documented | - *Appropriate at the minimum well elaborate chief complaint, mention aggravating and relieving factors, past medical history, and family history* |
| 2. No important component missed in the history | - *Not appropriate when any one of the major components listed in Q2-1 not included* |
| Q3 | Is the physical examination compressive | 1. A compressive physical examination done | - *Compressive when pertinent positive and negative findings are documented in the physical examination* - *The physical examination should focus on the patient’s main diagnosis* |
| 2. No compressive physical examination was done | - *No compressive when the physical examination does not include those mentioned in Q3-1* |
| Q4 | Is investigation appropriate? | 1. Yes, the investigation rational | - *Rationale when the ordered laboratory test is used for diagnosis, management plan, or prognostic values and monitoring.* - *The laboratory test should be in line with the patient’s clinical diagnoses* |
| 2. No, the investigation rational | *- Not rational when the investigation did not for*  *the test mentioned Q4-1* |

| Q5 | Is the diagnosis appropriate? | 1. Yes, the diagnosis is appropriate/ justifiable/ 2. No, the diagnosis needs modification | - *The timing and order of the symptoms, past medical history, risk factors for certain diseases, and test or imaging evidence support the diagnosis* - *No appropriate or justifiable based on the description mentioned in Q5-1* |
| --- | --- | --- | --- |
| Q6 | Is the management plan appropriate? | 1. Yes, the management plan is justifiable and appropriate | - *The therapy goal, disease-specific treatment options, potential adverse effects, and anticipated period of treatment are all*  *included in a completed treatment plan.* |
| 2. No, the management plan is not justifiable | - *No appropriate or justifiable based on the description mentioned in Q6-1* |
| Q7 | Is the medication sheet documented? | 1. Yes, the medication sheet and order sheet are documented on electronic medical records and available for the nurses |  |
| 1. No, the medication sheets are documented on electronic medical records and available for the nurses |
| 8Q | Is the order sheet documented? | 1. Yes, order sheets are documented on electronic medical records and are available for the nurses |
| 1. No, order sheets are not documented on electronic medical records and are available for the nurses |
| Q9 | Is the Vital sign measurement documented | 1. Yes, Vital signs are documented on electronic medical records |  |
|  |  | 2. No, Vital signs are not documented on electronic medical record |

Q-Question

**Supplement 3**: Process map demonstrating the steps involved in audit feedback monitoring of the medical records among newly admitted patients

Patient admitted to internal medicine ward

Junior physicians and nursing team document the

medical

Senior physician reviews the medical record

Evaluate the patients and give feedback about the medical documentation to the team

- The team correctsthe documentation based on the feedback
- The senior audits medical records and enters the data into the databases

The college quality team monitors the process
